# Supplementary material for: An introduction to the maximum entropy approach and its application to inference problems in biology
Source: PubMed Central journal article supplement (PMC5968179; doi:10.1016/j.heliyon.2018.e00596), 2018-04-13
Supplement: mmc1.pdf [file mmc1.pdf]

# An introduction to the Maximum Entropy approach and its application to inference problems in biology

## SUPPORTING MATERIAL

Andrea De Martino<sup>1,2,\*</sup> and Daniele De Martino<sup>3</sup>

<sup>1</sup>*Soft & Living Matter Lab, Institute of Nanotechnology (NANOTEC),  
Consiglio Nazionale delle Ricerche, Rome (Italy)*

<sup>2</sup>*Italian Institute for Genomic Medicine (IIGM), Turin (Italy)*

<sup>3</sup>*Institute of Science and Technology Austria, Klosterneuburg (Austria)*

### S1. DERIVATION OF $H$

To evaluate  $\Omega$  one can apply Stirling's approximation for the factorial, i.e.  $m! \simeq m^m e^{-m}$  (valid for sufficiently large  $m$ ), to each of the terms that appear in

$$\Omega = \frac{N!}{n_1! n_2! \cdots n_K!} . \quad (\text{S1})$$

This yields

$$\begin{aligned} \Omega &\simeq \frac{N^N e^{-N}}{n_1^{n_1} \cdots n_K^{n_K} e^{-(n_1 + \cdots + n_K)}} = \frac{N^N}{n_1^{n_1} \cdots n_K^{n_K}} = e^{\ln(N^N) - \ln(n_1^{n_1} \cdots n_K^{n_K})} \\ &= e^{N \ln N - \sum_{i=1}^K n_i \ln n_i} = e^{N[-\sum_{i=1}^K \frac{n_i}{N} (\ln n_i - \ln N)]} = e^{NH} , \quad (\text{S2}) \end{aligned}$$

where  $H$  is the entropy defined in Eq. (3) in the Main Text, i.e.

$$H = - \sum_{i=1}^K \frac{n_i}{N} \ln \frac{n_i}{N} , \quad (\text{S3})$$

and we used (twice) the fact that  $n_1 + \cdots + n_K = N$ .

### S2. $H \geq 0$

Because  $\sum_{i=1}^K n_i = N$ , the numbers  $\{n_i\}$  on which the entropy  $H$  (Eq. (S3)) depends are such that  $0 \leq n_i \leq N$  (or, equivalently,  $0 \leq (n_i/N) \leq 1$ ) for each  $i$ . Therefore,  $\ln(n_i/N) \leq 0$  for each  $i$ , with the equality holding only when  $n_i = N$ . In turn,  $(n_i/N) \ln(n_i/N) \leq 0$  for each  $i$ , with the equality holding only when  $n_i = N$  or  $n_i = 0$ . Hence  $H = -\sum_{i=1}^K (n_i/N) \ln(n_i/N) \geq 0$ , with  $H = 0$  only for the arrangements with  $n_i = N$  for some  $i$  and  $n_j = 0$  for each  $j \neq i$ .

### S3. THE MAXENT DISTRIBUTION ON $\{1, \dots, K\}$ UNDER A NORMALIZATION CONSTRAINT IS UNIFORM

To find the distribution  $\{p_i\}$  that maximizes the entropy as given in Eq. (4) in the Main Text, i.e.

$$H \equiv H[\{p_i\}] = - \sum_{i=1}^K p_i \ln p_i , \quad (\text{S4})$$

---

\* Corresponding author; email: andrea.demartino@roma1.infn.it

subject to the constraint

$$\sum_{i=1}^K p_i = 1 \quad (\text{S5})$$

one can resort to the method of Lagrange multipliers [1], which for our purposes amounts to computing the variation (derivative) of the function

$$F = H + \alpha \sum_{i=1}^K p_i \quad (\text{S6})$$

over  $p_i$ , setting it to zero and isolating  $p_i$  from the resulting expression. The first term in (S6) represents the function to be optimized, while the second represents the quantity whose value is constrained (as we are considering a case with the only constrained quantity given in (S5), a single extra term needs to be added to  $H$ ). The constant  $\alpha$  is called a ‘Lagrange multiplier’, and its value has to be computed self-consistently from the constraint. With some foresight, we write  $\alpha$  as  $1 - \ln Z$  with  $Z$  a constant. Differentiation of  $F$  over  $p_i$  yields

$$\delta F = \delta \left[ - \sum_{i=1}^K p_i \ln p_i + (1 - \ln Z) \sum_{i=1}^K p_i \right] = [- \ln p_i - \ln Z] \delta p_i \quad (\text{S7})$$

The above expression vanishes for  $p_i = p_i^* \equiv 1/Z$ , which is the MaxEnt distribution we sought for. It remains to evaluate  $Z$ . This is done from the condition  $\sum_{i=1}^K p_i^* = 1$ , which takes the form  $K/Z = 1$ . Hence we find  $Z = K$ , and the MaxEnt distribution is finally given by  $p_i^* = 1/K$  for each  $i = 1, \dots, K$ , i.e. by the uniform distribution on  $\{1, \dots, K\}$ .

#### S4. THE MAXENT DISTRIBUTION UNDER DIFFERENT CONSTRAINTS

**Constrained mean.** If, besides the normalization (S5), one is interested in constraining the mean of a certain variable  $x$  that takes values  $x_i$  in the  $K$  states (with  $i = 1, \dots, K$ ), one should impose an additional constraint on the quantity

$$\sum_{i=1}^K x_i p_i = \bar{x} \quad (\text{S8})$$

Proceeding as above, the function  $F$  now reads

$$F = H + (1 - \ln Z) \sum_{i=1}^K p_i + \beta \sum_{i=1}^K x_i p_i \quad (\text{S9})$$

with  $\beta$  the Lagrange multiplier associated to (S8). Differentiation now gives

$$\delta F = [- \ln p_i - \ln Z + \beta x_i] \delta p_i \quad (\text{S10})$$

whence the MaxEnt distribution

$$p_i^* = \frac{1}{Z} e^{\beta x_i} \quad (\text{S11})$$

follows. In this case,  $p_i^*$  is exponential. As before, the Lagrange multiplier  $Z$  is fixed by the condition  $\sum_{i=1}^K p_i^* = 1$  to  $Z = \sum_{i=1}^K e^{\beta x_i}$ .  $\beta$ , on the other hand, should be determined from the requirement that

$$\sum_{i=1}^K x_i p_i^* = \bar{x} \quad (\text{S12})$$

**Constrained mean and second moment.** In order to impose, together with (S5) and (S8), an additional constraint on the second moment of  $x$ , i.e. on

$$\sum_{i=1}^K x_i^2 p_i = \overline{x^2} \quad (\text{S13})$$

one should differentiate the function

$$F = H + (1 - \ln Z) \sum_{i=1}^K p_i + \beta \sum_{i=1}^K x_i p_i + \gamma \sum_{i=1}^K x_i^2 p_i . \quad (\text{S14})$$

It turns out that the MaxEnt distribution has a Gaussian form, namely

$$p_i^* = \frac{1}{Z} e^{\beta x_i + \gamma x_i^2} , \quad (\text{S15})$$

where the three Lagrange multipliers  $Z$ ,  $\beta$  and  $\gamma$  have to be determined from the three conditions

$$\sum_{i=1}^K p_i^* = 1 \quad , \quad \sum_{i=1}^K x_i p_i^* = \bar{x} \quad , \quad \sum_{i=1}^K x_i^2 p_i^* = \overline{x^2} . \quad (\text{S16})$$

**Constrained mean of the logarithm.** Finally, we impose (S5) together with a constraint on the mean value of the logarithm of  $x$ , namely

$$\sum_{i=1}^K p_i \ln x_i = \overline{\ln x} . \quad (\text{S17})$$

Differentiating

$$F = H + (1 - \ln Z) \sum_{i=1}^K p_i + \gamma \sum_{i=1}^K p_i \ln x_i , \quad (\text{S18})$$

one finds

$$p_i^* = \frac{x_i^\gamma}{Z} . \quad (\text{S19})$$

In other terms, the MaxEnt distribution is in this case a power law. Again, the Lagrange multipliers  $Z$  and  $\gamma$  have to be determined from the constraints

$$\sum_{i=1}^K p_i^* = 1 \quad , \quad \sum_{i=1}^K p_i^* \ln x_i = \overline{\ln x} . \quad (\text{S20})$$

## S5. MAXIMUM ENTROPY INFERENCE IN A COMPLEX SETTING: PAIRWISE MAXENT DISTRIBUTIONS

Based on the examples discussed in the previous section, the least biased distribution  $p(\mathbf{x})$  compatible with the empirical constraints is found by differentiating the function

$$F = H + (1 - \ln Z) \sum_{\mathbf{x}} p(\mathbf{x}) + \sum_{i=1}^R \beta_i \sum_{\mathbf{x}} x_i p(\mathbf{x}) + \sum_{i \leq j} \gamma_{ij} \sum_{\mathbf{x}} x_i x_j p(\mathbf{x}) \quad (\text{S21})$$

with respect to  $p(\mathbf{x})$ , where  $H$  is the entropy defined in Eq. (6) in the Main Text, namely

$$H = - \sum_{\mathbf{x}} p(\mathbf{x}) \ln p(\mathbf{x}) . \quad (\text{S22})$$

Note that we have introduced one Lagrange multiplier for the constraints enforcing normalization (i.e.  $\sum_{\mathbf{x}} p(\mathbf{x}) = 1$ ; this requires one multiplier denoted by  $Z$ ), mean (i.e.  $\sum_{\mathbf{x}} x_i p(\mathbf{x}) = \bar{x}_i$  for all  $i$ ; this requires one multiplier for each  $i$ , hence  $R$  in total, denoted by  $\beta_i$  with  $i = 1, \dots, R$ ) and correlations (i.e.  $\sum_{\mathbf{x}} x_i x_j p(\mathbf{x}) = \bar{x}_i \bar{x}_j$  for all  $i$  and  $j$ ; this requires one multiplier for each pair  $(i, j)$  with  $i \leq j$ , hence  $R(R+1)/2$  in total denoted by  $\gamma_{ij}$ ). This results in the MaxEnt distribution

$$p^*(\mathbf{x}) = \frac{1}{Z} e^{\sum_{i=1}^R \beta_i x_i + \sum_{i \leq j} \gamma_{ij} x_i x_j} . \quad (\text{S23})$$

Again, the total number of parameters to be determined matches that of constraints, and the values of the  $1 + R + R(R + 1)/2$  Lagrange multipliers are to be determined from the  $1 + R + R(R + 1)/2$  conditions

$$\sum_{\mathbf{x}} p^*(\mathbf{x}) = 1 \quad , \quad \sum_{\mathbf{x}} x_i p^*(\mathbf{x}) = \bar{x}_i \quad , \quad \sum_{\mathbf{x}} x_i x_j p^*(\mathbf{x}) = \overline{x_i x_j} \quad . \quad (\text{S24})$$

When the  $x_i$ 's are continuous variables ranging from  $-\infty$  to  $+\infty$  one can directly relate Lagrange multipliers to the inverse of the correlation matrix, as shown e.g. in [2]. In this so-called ‘mean-field’ case, Eq. (S23) is a multivariate Gaussian. In general, though, when  $R$  is large and data are taken from experiments, this problem can only be solved *in silico*. As this can prove to be a daunting task, several methods have been developed to achieve an efficient numerical solution (see e.g. [3] for a recent comprehensive review).

## S6. ENTROPY MAXIMIZATION IN METABOLIC NETWORKS SUBJECT TO CONSTRAINED MEAN GROWTH RATE

The MaxEnt distribution of flux patterns constrained by the empirical mean growth rate  $\bar{\lambda}$  is found by differentiating the function

$$F = H + (1 - \ln Z) \sum_{\mathbf{v}} p(\mathbf{v}) + \beta \sum_{\mathbf{v}} \lambda(\mathbf{v}) p(\mathbf{v}) \quad , \quad (\text{S25})$$

where

$$H = - \sum_{\mathbf{v}} p(\mathbf{v}) \ln p(\mathbf{v}) \quad (\text{S26})$$

is the entropy, in full analogy with (S9). One gets

$$p^*(\mathbf{v}) = \frac{1}{Z} e^{\beta \lambda(\mathbf{v})} \quad . \quad (\text{S27})$$

The restriction to the polytope of solutions can be applied straightforwardly by imposing that configurations  $\mathbf{v}$  satisfy the mass balance conditions  $\mathbf{S}\mathbf{v} = \mathbf{0}$  (viz. Eq. (21) in the Main Text) with the prescribed bounds of variability on each flux, i.e.

$$p^*(\mathbf{v}) = \begin{cases} \frac{1}{Z} e^{\beta \lambda(\mathbf{v})} & \text{if } \mathbf{S}\mathbf{v} = \mathbf{0} \quad , \\ 0 & \text{otherwise} \quad . \end{cases} \quad (\text{S28})$$

The values of  $Z$  and  $\beta$  have to be determined from the conditions

$$\sum_{\mathbf{v}} p^*(\mathbf{v}) = 1 \quad , \quad (\text{S29})$$

$$\sum_{\mathbf{v}} p^*(\mathbf{v}) \lambda(\mathbf{v}) = \bar{\lambda} \quad . \quad (\text{S30})$$

Alternatively, one can add an extra constraint in (S25) enforcing that, for each  $\mathbf{v}$ ,  $\mathbf{S}\mathbf{v} = \mathbf{0}$ . The value of  $Z$  is automatically set by (S29) to  $Z = \sum_{\mathbf{v}} e^{\beta \lambda(\mathbf{v})}$  (where the sum is over flux vectors such that  $\mathbf{S}\mathbf{v} = \mathbf{0}$ ), so that (S28) ultimately depends on a single parameter, i.e.  $\beta$ .

- 
- [1] Bertsekas, D.P., 2014. *Constrained optimization and Lagrange multiplier methods* (Academic Press).  
[2] Stein, R.R., Marks, D.S. and Sander, C., 2015. Inferring pairwise interactions from biological data using maximum-entropy probability models. *PLoS Comp Biol*, 11(7), e1004182. doi:10.1371/journal.pcbi.1004182  
[3] Nguyen, H.C., Zecchina, R. and Berg, J., 2017. Inverse statistical problems: from the inverse Ising problem to data science. *Adv Phys*, 66(3), 197-261. doi:10.1080/00018732.2017.1341604
